# Supplementary material
Source: Springer Nature journal article supplement (https://www.springermedizin.de/resource/supplementary/12882_2013_753_MOESM1_ESM.pdf/9454610)

ages

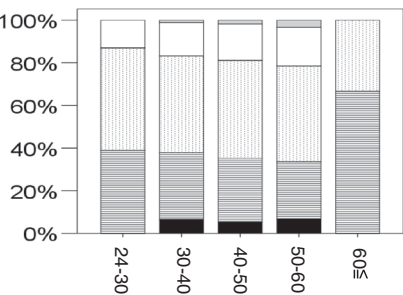

specialties

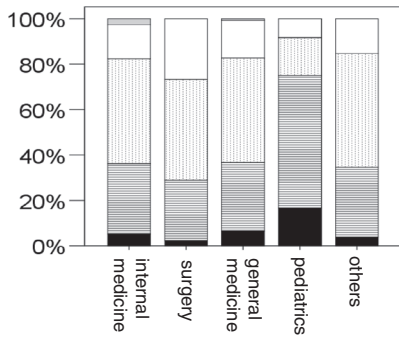

working places

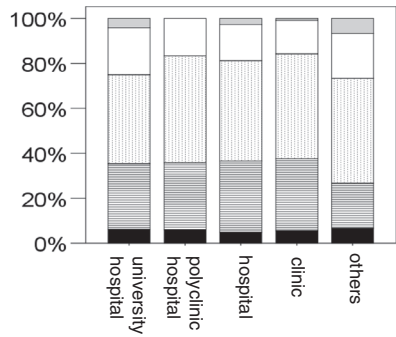

\*\* exercise frequencies

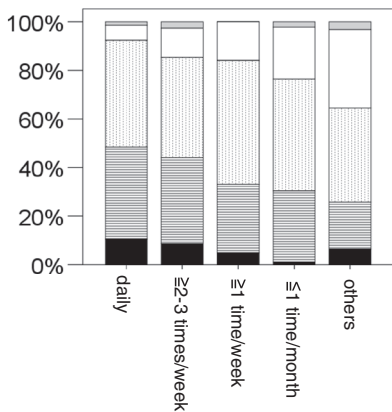

exercise intensities

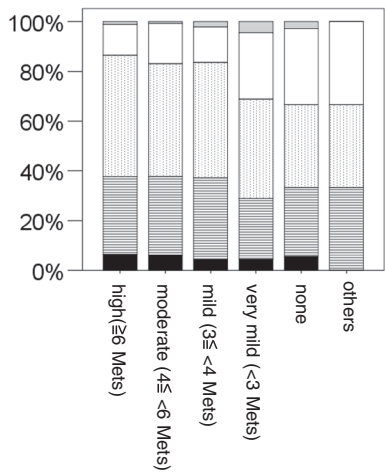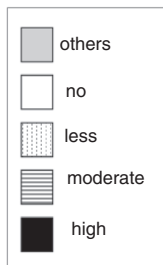

Supplement: MOESM1 [file 9454610]
